# Supplementary material
Source: Springer Nature journal article supplement (https://www.springermedizin.de/resource/supplementary/12885_2006_564_MOESM3_ESM.pdf/9469784)

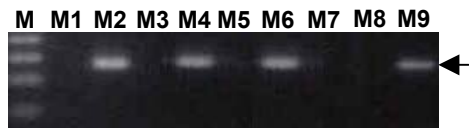

**APC**

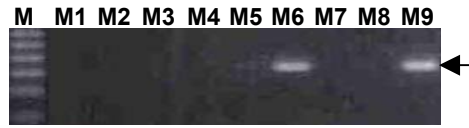

**BRCA1**

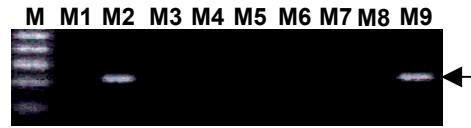

**DAPK**

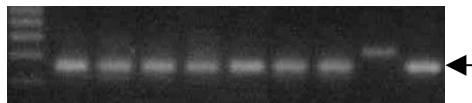

**FHIT**

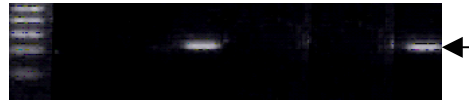

**hMLH1**

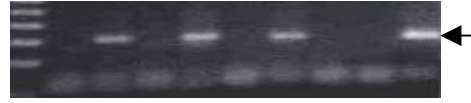

**p16**

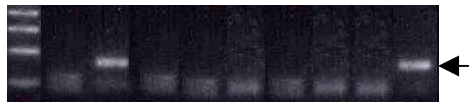

**MGMT**

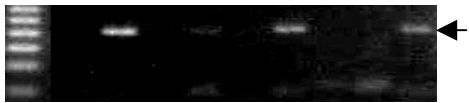

**PTEN**

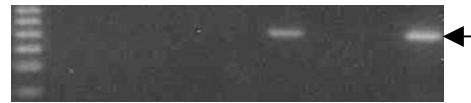

**TMS1**

Supplement: MOESM3 [file 9469784]
